## 1 **Genetic control of rhizosheath formation in pearl millet**

2 De la Fuente Cantó C.<sup>1</sup>, Diouf M.N.<sup>2,3,7</sup>, Ndour P.M.S.<sup>2,3</sup>, Debieu M.<sup>1</sup>, Grondin A.<sup>1,4,5</sup>, Passot  
3 S.<sup>1</sup>, Champion A.<sup>1</sup>, Barrachina C.<sup>6</sup>, Pratlong M.<sup>6</sup>, Gantet P.<sup>1</sup>, Assigbetsé K.<sup>2,3</sup>, Kane N.<sup>4</sup>, Cubry  
4 P.<sup>1</sup>, Diedhiou A.G.<sup>4,7</sup>, Heulin T.<sup>8</sup>, Achouak W.<sup>8</sup>, Vigouroux Y.<sup>1</sup>, Cournac L.<sup>2</sup>, Laplaze L.<sup>1,4,\*</sup>

5 <sup>1</sup> DIADE, Université de Montpellier, IRD, CIRAD, Montpellier, France

6 <sup>2</sup> Eco&Sols, Université de Montpellier, IRD, CIRAD, INRAE, Institut Agro, Montpellier,  
7 France

8 <sup>3</sup> Laboratoire Mixte International Intensification Écologique des Sols Cultivés en Afrique de  
9 l'Ouest (IESOL), Dakar, Senegal

10 <sup>4</sup> Laboratoire Mixte International Adaptation des Plantes et microorganismes associés aux  
11 Stress Environnementaux (LAPSE), Centre de recherche de Bel-Air, Dakar, Senegal

12 <sup>5</sup> CERAAS, Thiès, Senegal

13 <sup>6</sup> Montpellier GenomiX, Montpellier, France

14 <sup>7</sup> Département de Biologie Végétale, Faculté des Sciences et Techniques, Université Cheikh  
15 Anta Diop, Dakar, Sénégal

16 <sup>8</sup> Aix Marseille Univ, CEA, CNRS, BIAM, LEMiRE, Laboratory of Microbial Ecology of the  
17 Rhizosphere, ECCOREV FR 3098, Saint Paul-Lez-Durance, France F-13108

18 \* Author for correspondence: laurent.laplaze@ird.fr

## 19 **Running title**

20 Rhizosheath formation in pearl millet

21

## 22 **Highlight**

23 Formation of the rhizosheath, a layer of soil adhering to the root, is under complex genetic  
24 control in pearl millet and is mainly regulated by root exudation.

## 25 **Abstract**

26 The rhizosheath, the layer of soil that adheres strongly to roots, influences water and nutrients  
27 acquisition. Pearl millet is a cereal crop that plays a major role for food security in arid regions  
28 of sub Saharan Africa and India. We previously showed that root-adhering soil mass is a  
29 heritable trait in pearl millet and that it correlates with changes in rhizosphere microbiota  
30 structure and functions. Here, we studied the correlation between root-adhering soil mass and  
31 root hair development, root architecture, and symbiosis with arbuscular mycorrhizal fungi and  
32 we analysed the genetic control of this trait using genome wide association (GWAS) combined  
33 with bulk segregant analysis and gene expression studies. Root-adhering soil mass was weakly  
34 correlated only to root hairs traits in pearl millet. Twelve QTLs for rhizosheath formation were  
35 identified by GWAS. Bulk segregant analysis on a biparental population validated five of these  
36 QTLs. Combining genetics with a comparison of global gene expression in the root tip of  
37 contrasted inbred lines revealed candidate genes that might control rhizosheath formation in  
38 pearl millet. Our study indicates that rhizosheath formation is under complex genetic control  
39 in pearl millet and suggests that it is mainly regulated by root exudation.

40

## 41 **Keywords**

42 Arbuscular mycorrhizal fungi, Bulk segregant analysis, GWAS, Malate, Rhizosphere, Root  
43 exudates, Root hairs, Soil aggregation

44

## 45 **Abbreviations**

46 RAS: root-adhering soil

## 47 **Introduction**

48 Pearl millet is a small-seeded tropical cereal that was domesticated about 4,500 years ago in  
49 the Sahelian part of West Africa (Burgarella *et al.*, 2018). It is mostly grown in dry and poor  
50 soils as a rainfed crop and is therefore well adapted to environments prone to drought and heat  
51 stress for which it harbours largely untapped genetic diversity in the locally adapted cultivated  
52 and wild pearl millets (Debieu *et al.*, 2017; Varshney *et al.*, 2017; Burgarella *et al.*, 2018). The  
53 outstanding capacity for growing in harsh environments highlights the great potential of pearl  
54 millet as a biological model to investigate crop adaptation and resilience to abiotic constraints,  
55 as well as its key role for food security in some semi-arid tropical regions in Africa and Asia.  
56 Still, pearl millet yield remains low for two main reasons: the difficulty to reach its potential  
57 yield in constrained environments and the little attention that the crop has received from  
58 breeding programmes (Varshney *et al.*, 2017).

59 Root traits are emerging as new targets for breeding more sustainable and resilient crop  
60 varieties in global climate change scenarios (Lynch, 2019). The root system is responsible for  
61 plant water and nutrient acquisition. Phenotypic selection of root ideotypes combining  
62 architectural, anatomical and physiological traits has been proposed as a way to optimise access  
63 to soil resources in specific agroecosystems and crop management practices (Lynch, 2019).  
64 Besides root architecture, anatomy and physiology, the rhizosphere, the volume of soil around  
65 the root influenced by the root (York *et al.*, 2016), can be regarded as a plant extended  
66 phenotype and therefore a target for breeding more sustainable crops (Wissuwa *et al.*, 2009;  
67 De la Fuente Cantó *et al.*, 2020). Indeed, the dynamic interplay between root, soil and  
68 microbiota in the rhizosphere eases adaptation to changing environments and can have a  
69 remarkable impact on plant fitness (Turner *et al.*, 2013; De la Fuente Cantó *et al.*, 2020; Chai  
70 and Schachtman, 2021). The intricate relationships in the rhizosphere define a belowground  
71 niche where soil moisture, organic matter content, the composition of the microbial community  
72 and its activity are different from the bulk soil (Haichar *et al.*, 2008; Hinsinger *et al.*, 2009).  
73 Plants benefit from this interaction especially in constrained environments where access to  
74 nutrients and water is restricted (Yang *et al.*, 2009).

75 The rhizosheath size, or root-adhering soil mass, is a proxy in the study of this complex  
76 extended phenotype and an interesting potential target for breeding programmes (Ndour *et al.*,  
77 2020). Rhizosheath formation was first noticed as the sandy sheath surrounding the roots of  
78 desert plants (Price, 1911) and later reported to occur across many angiosperm orders (Brown

79 *et al.*, 2017). Increased rhizosheath size has been correlated with enhanced wheat and foxtail  
80 millet performance in drying soils (Basirat *et al.*, 2019; Liu *et al.*, 2019). In barley and oat,  
81 rhizosheath formation has been related with improved acquisition of major and essential trace  
82 elements in limiting water conditions (Nambiar, 1976; George *et al.*, 2014). A combination of  
83 root architectural and anatomical traits and the secretion of root exudates and mucilage have  
84 been connected to soil aggregation to the root (Pang *et al.*, 2017; Ndour *et al.*, 2020). For  
85 instance, root branching, root hair formation or symbiosis with arbuscular mycorrhizal fungi  
86 (AMF) have been associated to some extent with rhizosheath establishment (Moreno-  
87 Espíndola *et al.*, 2007; Brown *et al.*, 2017; Liu *et al.*, 2019). Root architectural traits have been  
88 found crucial for rhizosheath formation in wheat and foxtail millet (Delhaize *et al.*, 2012; Liu  
89 *et al.*, 2019). On the other hand, root exudates composition and mucilaginous polymers released  
90 by root-associated microorganisms impact the stability of soil aggregates that bind around the  
91 root (Galloway *et al.*, 2020). Root growth and exudates exert dynamic changes in the  
92 rhizosphere physical properties and hydraulic processes that affect soil nutrient dynamics and  
93 the composition of the rhizosphere associated microbiota (Dakora and Phillips, 2002; Kolb *et*  
94 *al.*, 2017; Sasse *et al.*, 2018; Chai and Schachtman, 2021). Despite the inherent complexity  
95 linked to the effect of exudates in the rhizosphere, some studies showed their direct relationship  
96 with rhizosheath formation. For example, greater mass of mucilage exuded by chickpea roots  
97 were linked with the formation of larger and more porous rhizosheaths capable of storing more  
98 soil moisture in drought tolerant cultivars (Rabbi *et al.*, 2018). In annual crops such as wheat,  
99 barley and maize, there is evidence of the remarkable plant genetic influence in the formation  
100 of rhizosheath and the processes of rhizodeposition influencing rhizosphere microbial activities  
101 (George *et al.*, 2014; Delhaize *et al.*, 2015; Mwafulirwa *et al.*, 2016; 2021b), however few  
102 studies have aimed to dissect the genetics underlying the conformation of this extended root  
103 phenotype (George *et al.*, 2014; Delhaize *et al.*, 2015; James *et al.*, 2016; Mwafulirwa *et al.*,  
104 2021a).

105 In previous studies, we reported a remarkable genotypic variability for root-adhering soil  
106 aggregation in pearl millet (Ndour *et al.*, 2021). Moreover, this variability was associated with  
107 changes in rhizosphere microbiota structure and function (Ndour *et al.*, 2017, 2021). Here, we  
108 analysed the relative contribution of root architectural characteristics and root colonization by  
109 AMF on root-adhering soil aggregation in pearl millet. We then combined a genome wide  
110 association analysis (GWAS), with bulk segregant analysis (BSA) and transcriptomic data to  
111 dissect the genetic bases of this complex trait.

112

## 113 **Materials and methods**

### 114 **Plant materials**

115 A panel of 181 pearl millet inbred lines developed at the International Crops Research Institute  
116 for the Semi-Arid Tropics (ICRISAT, Niger) from landraces and improved open-pollinated  
117 cultivars representing the genetic diversity of the crop in West and Central Africa was used in  
118 this study (Debieu *et al.*, 2018).

119 Two inbred lines from this panel with contrasted rhizosheath size measured by the ratio  
120 between the mass of root-adhering soil (RAS) and root biomass (RT; RAS/RT ratio; Ndour *et*  
121 *al.*, 2021): ICML-IS 11139 (small rhizosheath size parent) and ICML-IS 11084 (large  
122 rhizosheath size parent) were selected for a bi-parental cross. The obtained F2 offspring was  
123 then used in a bulk segregant analysis (BSA).

### 124 **Plant growth and measurement of soil aggregation**

125 Plants were grown for 28 days in “WM” shaped pots (WM 20-8-5, Thermoflan, Molières-  
126 Cavaillac) containing 1.5 kg of soil under natural light in a greenhouse in the ISRA/IRD Bel  
127 Air Campus in Dakar (Lat. 14.701778, Long. -17.426229, altitude 9 m) as previously described  
128 (Ndour *et al.*, 2021).

129 For the GWAS analysis, pearl millet lines were sown according to a complete random block  
130 design with seven repetitions. Thinning was performed to have one plant per pot. Soil moisture  
131 was adjusted daily at water-holding capacity. Plant watering was stopped 24 hours before  
132 harvesting to facilitate the separation of root-adhering soil (RAS) from bulk soil. Plants were  
133 harvested 28 days after planting by opening the pots gently and shaking the plant and its  
134 adhered soil at a constant speed (1100 rpm) for 1 min with a CAT S50 electric shaker (Cat  
135 Ingenieurbuero™) to separate the bulk soil from the RAS uniformly. Roots were then rinsed  
136 in a cup with demineralized water to collect RAS. The RAS was dried at 105 °C for three days  
137 and weighted. Roots and shoots were separated and dried at 65 °C for three days. The ratio  
138 between mass of RAS and mass of root tissue (RT; RAS/RT) was used to estimate the  
139 rhizosphere aggregation intensity (rhizosheath size) as previously described (Ndour *et al.*,  
140 2017).

141 For BSA analysis, RAS/RT ratio was measured on 553 F2 individuals grown in five successive  
142 blocks of 119, 112, 131, 130 and 61 F2 plants. Each of these blocks included six replicates  
143 randomly distributed for each parental line. At the end of the experiment, leaf disk samples of  
144 1.5 mm diameter were sampled for each individual plant and stored at -80 °C for genotyping.

145 For correlation analyses between RAS/RT ratio and related root traits (root architecture, root  
146 hair length and density and interactions with AMF), 8 contrasting genotypes for rhizosphere  
147 size were analysed in 2018 and 2020 (n=10 plants/genotype in 2018 and n=6 plants/genotype  
148 in 2020).

#### 149 **Root architecture**

150 Root architecture traits (length, average diameter, total root area) were measured using the  
151 WinRHIZO software (version 2012b) after scanning the roots using an Epson Perfection V700  
152 scanner. Roots were separated in two groups based on their diameter according to Passot *et al.*  
153 (2016): primary and crown roots (0.25 mm < diameters) and lateral roots (diameters < 0.25  
154 mm).

155 Root hair length and density were measured on four plants per genotype using images of the  
156 root hair zone of three lateral roots per plant. Images were taken using an optical microscope  
157 (BX50F, Olympus) equipped with a digital camera (Micro Publisher 3.3 RTV). For each lateral  
158 root, the total number of root hairs was recorded over a distance of 0.5 mm using the Mesurim  
159 free software (<http://acces.ens-lyon.fr/acces/logiciels/applications/mesurim/mesurim>) and the  
160 length of 10 randomly selected root hairs was measured using the ImageJ software.

#### 161 **Root colonization by arbuscular mycorrhizal fungi**

162 Intensity and frequency of root colonization by AMF were measured according to Trouvelot *et al.*  
163 *al.*, (1986) after roots staining with Trypan blue following the method described by Phillips  
164 and Hayman (1970). Stained root fragments were observed with a Nikon Labophot trinocular  
165 microscope. For each fragment, a score between zero and five was assigned according to the  
166 estimated proportion of root cortex colonized by AMF (Trouvelot *et al.*, 1986).

167 Frequency and intensity of root colonization were then computed using the following formulas:

168 Frequency (expressed in %):  $F = n/N \times 100$

169 where  $n$  is the number of fragments showing mycorrhizae and  $N$ , the number of observed  
170 fragments

171 Intensity (expressed in %):  $I = (95n_5 + 70n_4 + 30n_3 + 5n_2 + n_1)/N$

172 where  $n_1, n_2, n_3, n_4, n_5$  are the number of fragments scored respectively from 1 to 5 and  $N$ ,  
173 the number of fragments observed.

## 174 Heritability

175 Broad sense heritability was computed using the following formula:

$$176 \quad H^2 = \frac{\text{Var}(\text{line})}{\text{Var}(\text{line}) + \frac{\text{Var}(\text{res})}{n_{\text{plant/line}}}},$$

177 where  $n_{\text{plant/line}}$  is the average number of plants measured per line,  $\text{Var}(\text{line})$  is the variance  
178 associated with lines and  $\text{Var}(\text{res})$  is the residual variance.

179 Both variances are parameters of the following linear mixed model:

$$180 \quad \text{RSA} = \mu + \alpha_{\text{line}} + \varepsilon_{\text{res}},$$

181 where  $\mu$  is the overall mean soil aggregation,  $\alpha_{\text{line}}$  is the random effect attached to the lines with  
182  $\alpha_{\text{line}} \sim N(0, \text{Var}(\text{line}))$  and  $\varepsilon_{\text{res}}$  is the error term with  $\varepsilon_{\text{res}} \sim N(0, \text{Var}(\text{res}))$ .

## 183 Genome wide association mapping and statistical analysis

184 Genotyping by sequencing of this panel of inbred lines was previously reported (Debieu *et al.*,  
185 2018). As a preliminary step, we used the genotypic matrix to estimate the population structure.  
186 Individual ancestry coefficients were estimated using the R package LEA v2.0 (Frichot and  
187 François, 2015). We used a latent factor mixed model (LFMM) that considers ridge estimates  
188 and corrects for unobserved population cofounders, *i.e.* latent factors, to perform the GWAS  
189 (Caye *et al.*, 2019). In addition, we ran the efficient mixed-model association (EMMA, Kang  
190 *et al.*, 2008) and mixed linear model (MLM) implemented in the R package GAPIT (Lipka *et*  
191 *al.*, 2012) to contrast the results. The proportion of the phenotypic variance explained by a QTL  
192 was determined by estimating the  $R^2$  corrected for population structure of a linear model  
193 defined for the most significant SNPs.

## 194 **Bulk Segregant Analysis**

195 NGS-based BSA studies require establishing contrasted groups or bulks of lines to assess  
196 the differences in segregation of alleles using high-throughput sequencing (K. L. Nguyen *et*  
197 *al.*, 2019). The 10% extreme lines in the tails of the phenotype distribution for the RAS/RT  
198 ratio were selected and the corresponding leaf discs were pooled to form bulks of contrasted  
199 lines. Genomic DNA was isolated for each bulk using a MATAB (Mixed Alkyl Trimethyl  
200 Amonium Bromide) based method (Mariac *et al.*, 2006) and enriched DNA libraries were  
201 constructed for which 32,860 predicted genes from the pearl millet reference genome  
202 (Varshney *et al.*, 2017) were targeted using gene capture probes (myBaits®). High-throughput  
203 sequencing of the enriched DNA library was performed on an Illumina HiSeq platform by  
204 Novogene Company Limited (HK). Initial sequencing quality checks using FastQC version  
205 0.11.5 (Andrews, 2010) were followed by trimming and quality filter steps on which adaptors,  
206 barcode sequences and low-quality reads (< 35 bp) were removed. Paired sequences were then  
207 retained and aligned to the pearl millet reference genome using the BWA MEM algorithm  
208 (BWA version 0.7.17 - r1188, Li and Durbin, 2009). Reads mapping at the target-enriched  
209 regions were used for SNP calling using the UnifiedGenotyper algorithm from GATK 3.7  
210 (McKenna *et al.*, 2010). Down-sampling limit (dcov) was increased from the default value of  
211 250 to 9000 to ensure accounting for the maximum coverage reached at each position. Multi-  
212 allelic sites and those which exhibited a total allele frequency less than 0.25 were removed. In  
213 addition, sites with either low or high total sequencing depth (below the 25<sup>th</sup> and above the 95<sup>th</sup>  
214 percentiles respectively) were removed. SNPs with more than 50% missing data and minor  
215 allele frequency (MAF) under 5% were also excluded. Finally, the parental line ICML-IS  
216 11139 (low RAS/RT ratio) was used as the reference genome for the cross to designate the  
217 alternate and reference SNP variants in the bulks.

218 Euclidean distance-based statistics (Hill *et al.*, 2013) was used to measure the difference in  
219 allele frequency between the bulks. The Euclidean distance between allele frequencies of the  
220 bulks at each marker position ( $ED_m$ ) was calculated as follows:

$$221 \quad ED_m = \sqrt{(f_{aL} - f_{AL})^2 + (f_{aH} - f_{AH})^2}$$

222 where  $f_a$  and  $f_A$  correspond to the allele frequency of the alternate and reference allele in the  
223 low bulk (L) and the high bulk (H) respectively.



224 In order to reduce the effect of sequencing noise and increase the signal of the differences  
225 in allele frequency, we then calculated the fourth power of the cumulative *EDm* value in  
226 windows of 100 consecutive markers (Omboki *et al.*, 2018; Zhang *et al.*, 2019). The confidence  
227 interval of the statistic was determined using simulations as described (de la Fuente Cantó and  
228 Vigouroux 2021, under revision)

229

## 230 **Gene expression analyses**

231 Seeds from lines ICML-IS 11139 (low RAS/RT ratio) and ICML-IS 11155 (high RAS/RT  
232 ratio) were surface-sterilized and germinated in Petri dishes containing wet filter paper for 24  
233 h in the dark at 27 °C. After two days, plants were transferred to hydroponic tanks containing  
234 liquid half Hoagland solution and grown for 15 days at 27 °C (12 h light/12 h dark). RNA was  
235 extracted from crown root tips (two cm apex) using the RNeasy Plant Mini Kit (QIAGEN).  
236 RNA-seq was performed by the Montpellier GenomiX Platform (MGX,  
237 <https://www.mgx.cnrs.fr/>). Sequencing was performed on an Illumina HiSeq 2500. Three  
238 different statistical tests were used to identify differentially expressed genes: EdgeR (Robinson  
239 *et al.*, 2010), DESeq (Anders and Huber, 2010) and DESeq2 (Love *et al.*, 2014). GO terms  
240 enrichment was performed in the 1270 genes that were significantly differentially expressed  
241 between the two lines for all three statistical tests using the TopGO package in R.

## 242 **Statistical methods**

243 All statistical analyses were performed with R version 3.6.3 (R core Team, 2018).

244

## 245 **Results**

### 246 **Root-adhering soil aggregation is weakly correlated to root hair traits in pearl millet**

247 Several root traits have been proposed to contribute to root-adhering soil aggregation (as an  
248 integrative phenotype) including root hair development, root architecture, and arbuscular  
249 mycorrhizal symbiosis. We therefore analysed the contribution of these different traits to root-  
250 adhering soil aggregation in pearl millet. For this, we analysed correlation between root-  
251 adhering soil aggregation, root architecture, root hair length and density and frequency and

252 intensity of root colonization by AMF in eight inbred lines with contrasted rhizosphere  
253 aggregation phenotype (Ndour *et al.*, 2021) after four weeks of growth. Among root  
254 architecture traits, only the average root diameter (AvgDiam) was weakly and negatively  
255 correlated ( $p = 0.012$ ,  $r^2 = 0.057$ ) with root-adhering soil aggregation (Fig. 1A, Table 1). For  
256 root hairs, only average length of root hairs (AvgLRH) was weakly and positively correlated  
257 to root-adhering soil aggregation ( $p = 0.005$ ,  $r^2 = 0.077$ ; Fig. 1A, Table 1). No significant  
258 correlation was observed for all other traits including frequency and intensity of root  
259 colonization by AMF (Fig. 1A, Table 1). Similar results were found in two independent  
260 experiments (2018 and 2020; Supplementary Table S1 at *JXB* online).

261 Altogether, our results suggest that root hairs development could play a weak role in root-  
262 adhering soil aggregation in pearl millet and that root architectural traits and AMF colonization  
263 rate have no significant impact.

#### 264 **Genetic bases of rhizosheath formation in pearl millet**

265 We previously reported the phenotyping of a panel of pearl millet inbred lines for root-  
266 adhering soil aggregation (Ndour *et al.*, 2021). Briefly, a total of 1408 plants corresponding to  
267 181 inbred lines were phenotyped and we recorded an almost four-fold variation in rhizosheath  
268 size (RAS/RT ratio), ranging from 7.4 (ICML-IS 11139) to 26.3 (ICML-IS 11084; Ndour *et*  
269 *al.*, 2021). Here, we used these data to evaluate the heritability of root-adhering soil  
270 aggregation. A broad sense heritability of 0.72 was computed, suggesting that root-adhering  
271 soil aggregation is largely under genetic control. Altogether, these data indicate that root-  
272 adhering soil formation has high heritability and that a large genetic diversity exists in pearl  
273 millet.

274 We therefore analysed the genetic bases of root-adhering soil formation using association  
275 genetics. Out of the 181 inbred lines, 139 lines with good quality data for phenotype and  
276 genotype were retained to perform the association study. As a first step, we conducted a  
277 population structure analysis of the 139 lines (Supplementary Fig. S1) that confirmed the  
278 negligible genetic structure previously reported for this panel (Debieu *et al.*, 2018). A total of  
279 381,899 SNPs was used for the association analysis. We first calculated the least square means  
280 of the trait root-adhering soil aggregation (RAS/RT ratio) across the different experiments. The  
281 ratio ranged from 12.4 to 26.3 with an average of 18.0. The LFMM model for GWAS identified  
282 53 significant SNPs ( $p$ -value  $< 0.0001$ ) across the genome (Fig. 2A), defining 34 significant

283 regions or QTLs considering windows of 50 kb up and downstream of significant positions to  
284 define significant regions. The proportion of phenotypic variance accounted for the most  
285 significant SNPs defining QTLs ranged from 9.2 to 15.6 % indicating that the corresponding  
286 QTLs had small phenotypic effect.

287 We compared these results with two other GWAS methods (Fig. 2B&C). Thirty-nine of  
288 these SNPs included in 25 QTLs defined through LFMM were also found significant with  
289 EMMA, and 19 significant SNPs assigned to 14 QTLs using MLM model in GAPIT  
290 (Supplementary Table S2). Fifteen SNPs in 12 QTL regions were found significant across the  
291 three GWAS methods. Altogether, our GWAS analysis revealed 12 potential QTLs controlling  
292 root-adhering soil aggregation in pearl millet.

293 To back up our GWAS analysis, we performed bulk segregant analysis in a F2 population  
294 derived from a cross between two lines with contrasted RAS/RT phenotypes, ICML-IS 11139  
295 (low RAS/RT) and ICML-IS 11084 (high RAS/RT; Fig 3A). F2 plants were phenotyped in five  
296 consecutive blocks together with the parental inbred lines. We confirmed the contrasted  
297 RAS/RT ratio of the parental lines with average values of 15.0 (ICML-IS 11139) and 32.7  
298 (ICML-IS 11084, Fig. 3B). Ten individual F2 lines were dropped from the analysis leaving  
299 547 F2 with RAS/RT ratio ranging from 1.6 to 54.8 and with an average value of 22.3. The  
300 phenotype distribution of the F2 was slightly skewed towards high values of RAS/RT ratio and  
301 showed a significant block effect (Supplementary Fig. S2). We used log transformation of  
302 RAS/RT ratio in our analysis of variance and selected lines with extreme values of the residual  
303 term for the bulks. The bulks consisted in two groups of 55 F2 lines each, with RAS/RT ratio  
304 average values of 11.0 for the low RAS/RT bulk and 38.2 for the high RAS/RT bulk  
305 (Supplementary Table S3). A total of 223.6 Mbp reads were mapped to the target enriched  
306 regions and used for SNP calling. We identified a group of 23,160 SNP variants (1.5 SNPs per  
307 100 kb in average) between the bulks. The average sequencing depth was high with 887X and  
308 863X in the small and high RAS/RT bulk respectively. The NGS-based BSA analysis revealed  
309 significant differences in the allele frequency of 380 SNPs at the 95% confidence interval  
310 (Table 2, Fig 3C). These SNPs defined five significant chromosome regions linked to the  
311 segregation of the RAS/RT ratio phenotype: three on chromosome 5 (RAS5.1, RAS5.2 and  
312 RAS5.3) and two on chromosome 6 (RAS6.1, RAS6.2; Table 2). The smallest genomic region  
313 defined corresponded to RAS5.3 with 10.6 Mbp and 41 significant SNPs. In contrast, the  
314 largest significant region corresponded to RAS5.2, with 45 Mbp and 307 significant SNPs.

315 Interestingly, the range of four out of five BSA significant regions was found to overlay  
316 with the position of significant SNPs defined by GWAS (Figure 3C, Supplementary Table S2).  
317 Furthermore, the peak position of RAS5.1 on chromosome 5 is located 43 kb away from the  
318 SNP chr5\_3282686 identified by GWAS (LFMM and EMMA). Likewise, the RAS5.3 spans  
319 through a genomic region containing two GWAS QTLs (LFMM, MLM and EMMA) located  
320 113 kb and 244 kb away from the peak position of RAS5.3.

321 Altogether, the combination of GWAS and BSA analyses revealed genomic regions on  
322 chromosomes 5 and 6 controlling RAS/RT ratio in pearl millet.

### 323 **Comparison of gene expression in contrasted lines**

324 To further analyse the genes involved in rhizosheath formation, we compared gene  
325 expression in ICML-IS 11139 (low RAS/RT) and ICML-IS 11155 (high RAS/RT) roots.  
326 Production and secretion of root exudates occur along the root system (Haichar *et al.*, 2014),  
327 starting in the zone immediately behind the root tip (Schroth and Snyder, 1962). Similarly, root  
328 hair development occurs in the root tip. Thus, as these two processes seem to be the major  
329 determinants of root-soil aggregation in pearl millet, we hypothesized that genes controlling  
330 this trait might be preferentially expressed in the root tip. Phenotyping for RAS/RT ratio was  
331 performed at 28 days after planting, when the root system of pearl millet was made of one  
332 primary root and several crown roots possessing lateral roots (Passot *et al.*, 2016). As crown  
333 roots make up most of the root system at this stage and to avoid noise due to sample  
334 heterogeneity (different root types), we therefore compared gene expression in the crown root  
335 tips (2 cm apex) of the two contrasted lines. RNAseq revealed 1270 genes with significant  
336 differences in gene expression between the two contrasted lines using three combined statistical  
337 tests (EdgeR, DESeq et DESeq2,  $p$ -value < 0.05; Supplementary Fig. S3). A gene ontology  
338 analysis on 742 genes with GO annotation out of the 1270 differentially expressed genes  
339 revealed a significant enrichment in GO terms associated with proteins involved in molecular  
340 interactions (GO:0043531, ADP binding with lowest  $p$ -value) and enzymatic reactions  
341 (GO:0016706, oxidoreductase activity for instance; Supplementary Table S4).

### 342 **Candidate genes analysis**

343 We combined GWAS, BSA and gene expression analyses to identify candidate genes for RAS  
344 aggregation. We first focused our search for candidate genes in the QTL regions identified by  
345 GWAS that were coincident with regions of significance defined through BSA on

346 chromosomes 5 and 6 (GWAS QTLs 5.1, 5.3, 5.5, 5.6 and 6.3). We assessed the annotated  
347 genes from the reference genome (Varshney *et al.*, 2017) included in a 1 Mbp region centred  
348 around the most significant SNP position together with their expression data from the RNAseq  
349 experiment.

350 The most significant SNP marker in GWAS QTL 5.1 maps in chromosome 5 position  
351 3,282,686 bp in an intergenic region between a cluster of four genes coding for glyoxylate  
352 reductase (*Pgl\_GLEAN\_10016760*, *Pgl\_GLEAN\_10016761*, *Pgl\_GLEAN\_10016762* and  
353 *Pgl\_GLEAN\_10016764*). Out of the four genes, one was differentially expressed in the  
354 contrasted lines for RAS/RT, the others showed a weak and variable expression level within  
355 the same genotype. Glyoxylate reductases are recycling enzymes that reduce glyoxylate to  
356 glycolate (Hoover *et al.*, 2007). Interestingly, the glyoxylate cycle plays an important role in  
357 the synthesis of malate, which is a major metabolite excreted in root exudates (Ferne and  
358 Martinoia, 2009). This region also contains *Pgl\_GLEAN\_10016765*, a gene coding for an  
359 arginase with significantly higher expression in ICML-IS 11139 (low RAS/RT). Arginases  
360 metabolise arginine and provide nitrogen for the synthesis of other essential amino acids during  
361 plant development and stress response mechanisms (Siddappa and Marathe, 2020). Large  
362 variations in arginine concentrations have been associated with changes in root exudate  
363 composition in plants exposed to drought (Gargallo-Garriga *et al.*, 2018).

364 The GWAS QTLs 5.5 and 5.6 are coincident with the same region of significance defined in  
365 BSA, RAS5.3. This 10.56 Mbp region contains 105 annotated genes in the reference genome.  
366 Interestingly, the most significant marker trait association for GWAS QTL 5.5 falls into a gene  
367 showing some homology to remorins (*Pgl\_GLEAN\_10037821*). Remorins are membrane  
368 proteins playing an important role in plant biotic interactions (Jarsch and Ott, 2011).

369 The most significant SNP in GWAS QTL 6.3 maps in chromosome 6 position 227,616,229 bp  
370 in a gene coding for a galactinol-sucrose galactosyltransferase that is more expressed in the  
371 low RAS/RT ratio line (*Pgl\_GLEAN\_10028942*). These are enzymes involved in the synthesis  
372 of raffinose (Lehle and Tanner, 1973), an oligosaccharide stored principally in seeds, roots and  
373 tubers. Accumulation of raffinose in wheat and tomato roots occurs in response to low P  
374 conditions (Sung *et al.*, 2015; V.L. Nguyen *et al.*, 2019). Raffinose also accumulates in roots  
375 of pea seedlings exposed to water stress (Lahuta *et al.*, 2014). In addition, the secretion of this  
376 oligosaccharide in root exudates is linked to the complex biotic interactions in the rhizosphere  
377 (Fang and Leger, 2010; Liu *et al.*, 2017).

378 We also looked for candidate genes associated with the most significant SNPs consistently  
379 identified by GWAS that do not coincide with regions of significance defined through BSA.  
380 The GWAS QTL 2.3 contains a cluster of five significant SNPs mapping in the same gene,  
381 *Pgl\_GLEAN\_10019483*, encoding an LRR receptor-like serine/threonine-protein kinase. This  
382 gene is strongly expressed in the root tip of both pearl millet lines. LRR receptor kinases are  
383 involved in the perception of signalling molecules (Chakraborty *et al.*, 2019).

384 The GWAS QTL 6.2 consists of two SNPs markers on chromosome 6 mapping in an intergenic  
385 region between a cluster of four genes coding for acidic endochitinase  
386 (*Pgl\_GLEAN\_10020193*, *Pgl\_GLEAN\_10020194*, *Pgl\_GLEAN\_10020195* and  
387 *Pgl\_GLEAN\_10020196*), one of them with higher expression in the low aggregation line, the  
388 others with similar or weak expression in both lines. Endochitinase and chitinase-like proteins  
389 are defence related proteins with anti-fungal activity that are found in root exudates of different  
390 plant species (Nóbrega *et al.*, 2005; Tesfaye *et al.*, 2005; De-la-Peña *et al.*, 2010).

391 In chromosome 7, we found a group of five significant SNP markers within a 74 kb range  
392 defining the GWAS QTL 7.5. These SNPs were close to a gene encoding a putative  
393 chloroplastic dicarboxylate transporter that exchanges malate for succinate, fumarate and 2-  
394 oxoglutarate (*Pgl\_GLEAN\_10006630*). All these are important components of root exudates.  
395 The region also contains a gene coding for an ABC transporter G family member  
396 (*Pgl\_GLEAN\_10006636*). ABC transporters are involved in the transport of root exudates  
397 (Badri *et al.*, 2009; Baetz and Martinoia, 2014).

## 398 **Discussion**

399 Here, we investigated root system architectural traits with potential impact on rhizosheath  
400 formation in pearl millet. The presence of root hairs is essential for rhizosheath formation but  
401 the impact of root hair length and density on rhizosheath size varies considerably between plant  
402 species (Brown *et al.*, 2017). Studies in wheat and maize showed that root hair length is  
403 strongly correlated with rhizosheath weight (Delhaize *et al.*, 2012; Adu *et al.*, 2017). Similarly,  
404 in foxtail millet, increased rhizosheath formation was found related with the plastic response  
405 in root hair formation (increases in root hair elongation and density) in dry soils (Liu *et al.*,  
406 2019). This relationship was not as clear in crops such as barley (George *et al.*, 2014). However,  
407 a recent study shows an increased rhizosheath formation in barley grown in drying soil  
408 associated with auxin-promoted growth of root and root hairs as a consequence of ABA

409 accumulation (Zhang *et al.*, 2021). In our study on pearl millet, we have identified a weak but  
410 significant correlation between rhizosheath formation, which is synonymous with root-  
411 adhering soil formation in this work, and root hair length ( $p = 0.005$ ,  $r^2 = 0.077$ ). This suggests  
412 that root hairs are involved in rhizosheath formation in pearl millet but that they play a limited  
413 role in our experimental conditions.

414 Root association with arbuscular mycorrhizal fungi (AMF) has been proposed to contribute to  
415 rhizosheath formation (Pang *et al.*, 2017). In our study, we did not find any correlation between  
416 rhizosheath formation and AMF colonization rate in pearl millet suggesting that AMF  
417 colonization level is not an important driver in rhizosphere aggregation in this species.

418 Altogether, we hypothesise that rhizosheath formation or the aggregation of soil particles to  
419 the root in pearl millet is mainly driven by other traits. Root exudates and mucilaginous  
420 polymers released by root-associated microorganisms as well as the enzymatic activities linked  
421 to the crosstalk interactions occurring in the rhizosphere are prime candidates. Accordingly,  
422 the different orders of bacteria predominantly found in the rhizosphere of pearl millet lines with  
423 contrasted root soil aggregation suggests that the differences in rhizosheath formation could be  
424 linked to crosstalks between the plant and microbial community (Ndour *et al.*, 2017, 2021).  
425 Further work will be needed to test this hypothesis.

426 In the current study, the large variation in rhizosheath size in a genetically diverse group of  
427 inbred lines revealed a high heritability value for the trait ( $H^2=0.72$ ). Although rhizosheath  
428 formation relies on a range of traits mainly related with root morphology and exudates, it has  
429 been found under genetic control in other cereal crops such as wheat (Delhaize *et al.*, 2015;  
430 James *et al.*, 2016) and barley (George *et al.*, 2014; Gong and McDonald, 2017), becoming a  
431 potentially interesting target trait for breeding (Ndour *et al.*, 2020). Chromosome regions  
432 associated with rhizosheath size were identified in both crops, however few candidate genes  
433 underlying the QTL regions have been proposed. Interestingly, comparative evaluation of the  
434 multiple loci identified in these studies shows a lack of QTLs identified across diverse growing  
435 conditions suggesting, to some extent, a large QTL by environment interaction likely linked to  
436 the plasticity of rhizosheath formation.

437 Here, the combination of GWAS and BSA allowed the identification of four chromosome  
438 regions controlling rhizosheath size in pearl millet and ultimately some putative candidate  
439 genes based on gene annotations in the reference genome (Varshney *et al.*, 2017). GWAS

440 allowed the identification of 34 significant QTLs using the latent factor mixed model or LFMM  
441 (Caye *et al.*, 2019) method. Many of these associations were confirmed using two other models  
442 for GWAS analysis (EMMA and MLM). The phenotypic variance explained (PVE) by these  
443 loci ranged from 11.2% to 14.7% suggesting that rhizosheath size as a complex trait determined  
444 by many QTLs of moderated effect in pearl millet. Consistently, studies in biparental and  
445 multiparental populations of wheat revealed several QTLs linked to rhizosheath formation with  
446 proportions of variation explained by QTLs around 5 to 10%. (Delhaize *et al.*, 2015; James *et*  
447 *al.*, 2016). Nonetheless, one major QTL for the trait was also identified in wheat (James *et al.*,  
448 2016).

449 Few genetic studies have identified genes potentially involved in rhizosheath formation and  
450 their predicted functions were mainly linked to root system morphogenesis and growth. For  
451 example, root hair length is a major driver determining rhizosheath size in wheat and,  
452 accordingly, genes coding for basic helix-loop-helix family of transcription factors that are  
453 known to control root hair development were identified as potential candidates underlying a  
454 rhizosheath QTL in that species (Delhaize *et al.*, 2015). In barley, genes controlling cell  
455 division in root apical meristem at seedling stage and genes linked to tolerance to drought and  
456 cold were also identified as putative candidates underlying some genomic regions associated  
457 with rhizosheath size (George *et al.*, 2014).

458 In contrast, in our study, candidate genes were mostly related to plant metabolism and transport.  
459 Combining BSA and GWAS analyses revealed five co-localizing QTL regions. Candidate  
460 genes in these QTLs regions were mostly linked with root metabolic activities such as the  
461 synthesis of compounds commonly found in root exudates. For instance, the glyoxylate  
462 reductase and the arginase identified as putative candidates for QTL 5.1 are involved in the  
463 reduction and storage of essential compounds (i.e., glyoxylate and nitrogen) required for  
464 metabolic processes that mediate the synthesis of organic acids like malate and the synthesis  
465 of amino acids, respectively (Igamberdiev and Eprintsev, 2016; Siddappa and Marathe, 2020).  
466 These are major primary metabolites of root exudates which variations in concentration can  
467 trigger plant adjustments to enhance root access and mobilisation of soil phosphate and  
468 nitrogen when these nutrients are limited (Carvalhais *et al.*, 2011; Mora-Macías *et al.*, 2017;  
469 Canarini *et al.*, 2019). Further, these compounds have been found to promote chemotaxis of  
470 beneficial bacteria into the rhizosphere (Feng *et al.*, 2018). In fact, a recent study showed how  
471 differences in malate concentration in root exudates impacted the composition of microbial



472 communities associated with wheat and rice root systems (Kawasaki *et al.*, 2021). Another  
473 potential candidate gene identified for QTL 6.3, a galactinol-sucrose galactosyltransferase, is  
474 involved in the synthesis of raffinose, an oligosaccharide which variations in concentration in  
475 root exudates has been found to favour root colonisation by rhizosphere microbes (Liu *et al.*,  
476 2017).

477 Our genetic analysis is therefore fully consistent with our analysis showing that root  
478 architectural, root hair and AM symbiosis traits are not or poorly correlated with rhizosheath  
479 formation in pearl millet, and with our expression study that shows that genes involved in plant  
480 metabolism are differentially regulated between lines with contrasted rhizosheath size. It is also  
481 consistent with previous research showing differences in the rhizosphere metabolic activity of  
482 pearl millet lines with contrasted rhizosheath size (Ndour *et al.*, 2021). In this study, increased  
483 activity of enzymes such as chitinase and phosphomonoesterase was observed in the  
484 rhizosphere of pearl millet lines with larger rhizosheath (same contrasted RAS/RT lines used  
485 in the present work). We hypothesised that increased exudation in lines with larger rhizosheath  
486 size lead not only to an enhanced stability of root-adhering soil aggregates but also to a decrease  
487 of pH that could have stimulated these enzyme activities (Ndour *et al.*, 2021). Moreover, the  
488 amount of root exudate and the function of these enzymes could also impact the rhizosphere  
489 microbial communities promoting rhizosheath formation and explain the difference found in  
490 microbiota diversity in contrasted pearl millet lines (Ndour *et al.*, 2021).

491 In conclusion, our physiological and genetic analysis suggest a central role for root exudation  
492 (quantitatively or qualitatively) in the regulation of rhizosheath formation in pearl millet.  
493 Rhizosheath formation seems to be controlled by many QTLs with small effects. We identified  
494 several candidate genes controlling this trait and future work will focus on the validation and  
495 characterization of the molecular mechanisms regulating rhizosheath formation in pearl millet.

496

#### 497 **Supplementary data**

498 Figure S1. Ancestry estimation using the cross-entropy criterion.

499 Figure S2. Frequency distribution of the RAS/RT phenotype in the bi-parental population  
500 designed for BSA experiment.

501 Figure S3. Number of genes differentially expressed in two contrasted inbred lines.  
502 Table S1. Spearman correlation between the different traits in 2018 and 2020 experiments.  
503 Table S2. Significant marker-trait associations for root-adhering soil aggregation using 3  
504 GWAS methods  
505 Table S3. RAS/RT phenotype in the contrasted inbred lines and the bulks used for BSA.  
506 Table S4. Top ten GO enriched terms in genes differentially expressed between contrasting  
507 inbred lines.

### 508 **Acknowledgements**

509 This work was supported by the French National Research Institute for Sustainable  
510 Development (IRD), the French Agence Nationale de la Recherche (ANR grant RootAdapt  
511 ANR17-CE20-0022-01 to LL), the CGIAR Research Programme on Grain Legumes and  
512 Dryland Cereals (GLDC), the NewPearl grant in the frame of the CERES initiative by the  
513 Agropolis Fondation (AF 1301-015 to LL as part of the ‘Investissement d'avenir’ ANR-10-  
514 LABX-0001-01 under the frame of I-SITE MUSE ANR-16-IDEX-0006), and by the  
515 Fondazione Cariplo (No FC 2013-0891).

516

### 517 **Authors contributions**

518 YV, LC and LL conceptualized and supervised the research; LL acquired the funding. CFC,  
519 MND, PMSN, MD, AG, SP, CB, and MP carried out the measurements and performed formal  
520 analyses. All authors discussed and evaluated the data. CFC, MND, PMSN, AG, YV, LC and  
521 LL wrote the first draft of the manuscript; all authors revised the manuscript and gave final  
522 approval for publication.

523

### 524 **Data Availability**

525 The data that support the findings of this study are openly available at the National Center for  
526 Biotechnology Information (NCBI). Genotyping (GBS) data are available in genbank under  
527 reference number PRJNA492967 (GWAS) and PRJNA769524 (BSA). RNAseq data are  
528 available in the Gene Expression Omnibus (GEO) under reference GSE185425.

## References

- Adu MO, Asare PA, Yawson DO, et al.** 2017. Quantifying variations in rhizosheath and root system phenotypes of landraces and improved varieties of juvenile maize. *Rhizosphere* 3, 29–39.
- Anders S, Huber W.** 2010. Differential expression analysis for sequence count data. *Genome Biology* 11, R106.
- Andrews S.** 2010. FastQC: a quality control tool for high throughput sequence data. Available online at: <https://www.bioinformatics.babraham.ac.uk/projects/fastqc/>
- Badri D V., Quintana N, El Kassis EG, et al.** 2009. An ABC Transporter Mutation Alters Root Exudation of Phytochemicals That Provoke an Overhaul of Natural Soil Microbiota. *Plant Physiology* 151, 2006–2017.
- Baetz U, Martinoia E.** 2014. Root exudates: The hidden part of plant defense. *Trends in Plant Science* 19, 90–98.
- Basirat M, Mousavi SM, Abbaszadeh S, et al.** 2019. The rhizosheath : a potential root trait helping plants to tolerate drought stress. *Plant and Soil* 445, 565–575.
- Brown LK, George TS, Neugebauer K, et al.** 2017. The rhizosheath – a potential trait for future agricultural sustainability occurs in orders throughout the angiosperms. *Plant and Soil* 418, 115–128.
- Burgarella C, Cubry P, Kane NA, et al.** 2018. A western Sahara centre of domestication inferred from pearl millet genomes. *Nature Ecology & evolution* 2, 1377–1380.
- Canarini A, Kaiser C, Merchant A, et al.** 2019. Root Exudation of Primary Metabolites: Mechanisms and Their Roles in Plant Responses to Environmental Stimuli. *Frontiers in Plant Science* 10, 157.
- Carvalhais LC, Dennis PG, Fedoseyenko D, et al.** 2011. Root exudation of sugars, amino acids, and organic acids by maize as affected by nitrogen, phosphorus, potassium, and iron deficiency. *Journal of Plant Nutrition and Soil Science* 174, 3–11.
- Caye K, Jumentier B, Lepeule J, et al.** 2019. LFMM 2: Fast and accurate inference of gene-

environment associations in genome-wide studies. *Molecular Biology and Evolution* 36, 852–860.

**Chai YN, Schachtman DP.** 2021. Root exudates impact plant performance under abiotic stress. *Trends in Plant Science*, *in press*.

**Chakraborty S, Nguyen B, Wasti SD, et al.** 2019. Plant Leucine-Rich Repeat Receptor Kinase (LRR-RK): Structure, Ligand Perception, and Activation Mechanism. *Molecules* 24, 3081.

**Dakora FD, Phillips DA.** 2002. Root exudates as mediators of mineral acquisition in low-nutrient environments. *Plant and Soil* 245, 35–47.

**De la Fuente Cantó C, Simonin M, King E, et al.** 2020. An extended root phenotype: the rhizosphere, its formation and impacts on plant fitness. *Plant Journal* 103, 951–964.

**De-la-Peña C, Badri DV, Zhentian L, et al.** 2010. Root Secretion of Defense-related Proteins Is Development-dependent and Correlated with Flowering Time. *Journal of Biological Chemistry* 285, 30654–30665.

**Debieu M, Kanfany G, Laplaze L.** 2017. Pearl Millet Genome: Lessons from a Tough Crop. *Trends in Plant Science* 22, 911–913.

**Debieu M, Sine B, Passot S, et al.** 2018. Response to early drought stress and identification of QTLs controlling biomass production under drought in pearl millet. *PloS one*, 373233.

**Delhaize E, James RA, Ryan PR.** 2012. Aluminium tolerance of root hairs underlies genotypic differences in rhizosphere size of wheat (*Triticum aestivum*) grown on acid soil. *New Phytologist* 195, 609–619.

**Delhaize E, Rathjen TM, Cavanagh CR.** 2015. The genetics of rhizosphere size in a multiparent mapping population of wheat. *Journal of Experimental Botany* 66, 4527–4536.

**Fang W, Leger RJS.** 2010. Mrt, a Gene Unique to Fungi, Encodes an Oligosaccharide Transporter and Facilitates Rhizosphere Competency in *Metarhizium robertsii*. *Plant Physiology* 154, 1549–1557.

**Feng H, Zhang N, Du W, et al.** 2018. Identification of chemotaxis compounds in root exudates

and their sensing chemoreceptors in plant-growth-promoting rhizobacteria *Bacillus amyloliquefaciens* SQR9. *Molecular Plant-Microbe Interactions* 31, 995–1005.

**Fernie AR, Martinoia E.** 2009. Malate. Jack of all trades or master of a few? *Phytochemistry* 70, 828–832.

**Frichot E, François O.** 2015. LEA: An R package for landscape and ecological association studies. *Methods in Ecology and Evolution* 6, 925–929.

**Galloway AF, Akhtar J, Marcus SE, et al.** 2020. Cereal root exudates contain highly structurally complex polysaccharides with soil-binding properties. *Plant Journal* 103, 1666–1678.

**Gargallo-Garriga A, Preece C, Sardans J, et al.** 2018. Root exudate metabolomes change under drought and show limited capacity for recovery. *Scientific Reports* 8, 1–15.

**George TS, Brown L., Ramsay L, et al.** 2014. Understanding the genetic control and physiological traits associated with rhizosheath production by barley (*Hordeum vulgare*). *New Phytologist* 203, 195–205.

**Gong X, McDonald G.** 2017. QTL mapping of root traits in phosphorus-deficient soils reveals important genomic regions for improving NDVI and grain yield in barley. *Theoretical and Applied Genetics* 130, 1885–1902.

**Haichar Z, Marol C, Berge O, et al.** 2008. Plant host habitat and root exudates shape soil bacterial community structure. *The ISME Journal* 2, 1221–1230.

**Haichar Z, Santaella C, Heulin T.** 2014. Soil Biology & Biochemistry Root exudates mediated interactions belowground. *Soil Biology and Biochemistry* 77, 69–80.

**Hill JT, Demarest BL, Bisgrove BW, et al.** 2013. MMAPPR: Mutation Mapping Analysis Pipeline for Pooled RNA-seq. *Genome Research* 23, 687–697.

**Hinsinger P, Bengough AG, Vetterlein D, et al.** 2009. Rhizosphere: Biophysics, biogeochemistry and ecological relevance. *Plant and Soil* 321, 117–152.

**Hoover GJ, Van Cauwenberghe OR, Breitkreuz KE, et al.** 2007. Characteristics of an *Arabidopsis* glyoxylate reductase: general biochemical properties and substrate specificity for

the recombinant protein, and developmental expression and implications for glyoxylate and succinic semialdehyde metabolism in planta. *Botany* 85, 883–895.

**Igamberdiev AU, Eprintsev AT.** 2016. Organic acids: The pools of fixed carbon involved in redox regulation and energy balance in higher plants. *Frontiers in Plant Science* 7, 1042.

**James RA, Weligama C, Verbyla K, et al.** 2016. Rhizosheaths on wheat grown in acid soils: phosphorus acquisition efficiency and genetic control. *Journal of Experimental Botany* 67, 3709–3718.

**Jarsch IK, Ott T.** 2011. Perspectives on Remorin Proteins, Membrane Rafts, and Their Role During Plant-Microbe Interactions. *Molecular Plant-Microbe Interactions* 24, 7–12.

**Kang HM, Zaitlen NA, Wade CM, et al.** 2008. Efficient Control of Population Structure in Model Organism Association Mapping. 1723, 1709–1723.

**Kawasaki A, Dennis PG, Forstner C, et al.** 2021. Manipulating exudate composition from root apices shapes the microbiome throughout the root system. *Plant Physiology* 0, 1–17.

**Kolb E, Legué V, Auvergne UC, et al.** 2017. Physical Root-Soil Interactions. *Physical Biology* 14, 065004.

**Lahuta LB, Pluskota WE, Stelmaszewska J, et al.** 2014. Dehydration induces expression of GALACTINOL SYNTHASE and RAFFINOSE SYNTHASE in seedlings of pea (*Pisum sativum L.*). *Journal of Plant Physiology* 171, 1306–1314.

**Lehle L, Tanner W.** 1973. The Function of myo-Inositol in the Biosynthesis of Raffinose. *European Journal of Biochemistry* 38, 103–110.

**Li H, Durbin R.** 2009. Fast and accurate short read alignment with burrows-wheeler transform. *Bioinformatics* 25, 1754–1760.

**Lipka AE, Tian F, Wang Q, et al.** 2012. GAPIT: genome association and prediction integrated tool. *Bioinformatics* 28, 2397–2399.

**Liu Y, Chen L, Wu G, et al.** 2017. Identification of Root-Secreted Compounds Involved in the Communication Between Cucumber, the Beneficial *Bacillus amyloliquefaciens*, and the Soil-Borne Pathogen *Fusarium oxysporum*. *Molecular Plant-Microbe Interactions* 30, 53–62.

**Liu TY, Ye N, Song T, et al.** 2019. Rhizosheath formation and involvement in foxtail millet (*Setaria italica*) root growth under drought stress. *Journal of Integrative Plant Biology* 61, 449–462.

**Love MI, Huber W, Anders S.** 2014. Moderated estimation of fold change and dispersion for RNA-seq data with DESeq2. *Genome Biology* 15, 550.

**Lynch JP.** 2019. Root phenotypes for improved nutrient capture: an underexploited opportunity for global agriculture. *New Phytologist* 223, 548–564.

**Mariac C, Luong V, Kapran I, et al.** 2006. Diversity of wild and cultivated pearl millet accessions (*Pennisetum glaucum* [L.] R. Br.) in Niger assessed by microsatellite markers. *Theoretical and Applied Genetics* 114, 49–58.

**McKenna A, Hanna M, Banks E, et al.** 2010. The Genome Analysis Toolkit: A MapReduce framework for analyzing next-generation DNA sequencing data. *Genome Research* 20, 1297–1303.

**Mora-Macías J, Ojeda-Rivera JO, Gutiérrez-Alanís D, et al.** 2017. Malate-dependent Fe accumulation is a critical checkpoint in the root developmental response to low phosphate. *Proceedings of the National Academy of Sciences of the United States of America* 114, E3563–E3572.

**Moreno-Espíndola IP, Rivera-Becerril F, de Jesús Ferrara-Guerrero M, et al.** 2007. Role of root-hairs and hyphae in adhesion of sand particles. *Soil Biology and Biochemistry* 39, 2520–2526.

**Mwfulirwa L, Baggs EM, Russell JR, et al.** 2016. Barley genotype influences stabilization of rhizodeposition-derived C and soil organic matter mineralization. *Soil Biology and Biochemistry* 95, 60–69.

**Mwfulirwa L, Baggs EM, Russell J, et al.** 2021a. Identification of barley genetic regions influencing plant–microbe interactions and carbon cycling in soil. *Plant and Soil*. <https://doi.org/10.1007/s11104-021-05113-6>

**Mwfulirwa L, Paterson E, Cairns JE, et al.** 2021b. Genotypic variation in maize (*Zea mays*) influences rates of soil organic matter mineralization and gross nitrification. *New Phytologist*

231, 2015–2028.

**Nambiar E.** 1976. Uptake of Zn<sup>65</sup> from dry soil by plants. *Plant and Soil* 44, 267–271.

**Ndour PMS, Barry CM, Tine D, et al.** 2021. Pearl millet genotype impacts microbial diversity and enzymatic activities in relation to root-adhering soil aggregation. *Plant and Soil* 464, 109–129.

**Ndour PMS, Gueye M, Barakat M, et al.** 2017. Pearl Millet Genetic Traits Shape Rhizobacterial Diversity and Modulate Rhizosphere Aggregation. *Frontiers in Plant Science* 8, 1288.

**Ndour PMS, Heulin T, Achouak W, et al.** 2020. The rhizosheath: from desert plants adaptation to crop breeding. *Plant and Soil* 456, 1–13.

**Nguyen K Le, Grondin A, Courtois B, et al.** 2019. Next-Generation Sequencing Accelerates Crop Gene Discovery. *Trends in Plant Science* 24, 263–274.

**Nguyen VL, Palmer L, Roessner U, et al.** 2019. Genotypic Variation in the Root and Shoot Metabolite Profiles of Wheat (*Triticum aestivum* L.) Indicate Sustained, Preferential Carbon Allocation as a Potential Mechanism in Phosphorus Efficiency. *Frontiers in Plant Science* 10, 1–14.

**Nóbrega FM, Santos IS, Da Cunha M, et al.** 2005. Antimicrobial proteins from cowpea root exudates: inhibitory activity against *Fusarium oxysporum* and purification of a chitinase-like protein. *Plant and Soil* 272, 223–232.

**Omboki RB, Zheng Y, Chen Z, et al.** 2018. Pooled mapping of quantitative trait loci conferring male sterility - conditioned glume split in rice (*Oryza sativa*). *Plant Breeding* 137, 848–856.

**Pang J, Ryan MH, Siddique KHM, Simpson RJ.** 2017. Unwrapping the rhizosheath. *Plant and Soil* 418, 129–139.

**Passot S, Gnacko F, Moukouanga D, et al.** 2016. Characterization of Pearl Millet Root Architecture and Anatomy Reveals Three Types of Lateral Roots. *Frontiers in Plant Science* 7, 1–11.



**Phillips JM, Hayman DS.** 1970. Improved procedures for clearing roots and staining parasitic and vesicular–arbuscular mycorrhizal fungi for rapid assessment of infection. *Transactions of the British Mycological Society* 55, 158–161.

**Price SR.** 1911. The roots of some North African desert-glasses. *New Phytologist* 10, 328–340.

**R Core Team.** 2018. R: a language and environment for statistical computing. Vienna, Austria: R Foundation for statistical Computing. <https://www.R-project.org/>.

**Rabbi SMF, Tighe MK, Flavel RJ, et al.** 2018. Plant roots redesign the rhizosphere to alter the three- dimensional physical architecture and water dynamics. *New Phytologist* 219, 542–550.

**Robinson MD, Mccarthy DJ, Smyth GK.** 2010. edgeR: a Bioconductor package for differential expression analysis of digital gene expression data. *Bioinformatics* 26, 139–140.

**Sasse J, Martinoia E, Northen T.** 2018. Feed Your Friends: Do Plant Exudates Shape the Root Microbiome? *Trends in Plant Science* 23, 25–41.

**Schroth MN, Snyder WC.** 1962. Exudation patterns from bean seeds and hypocotyls and their effects on *Fusarium solanii* f. *phaseoli* (Abstr.). *Phytopathology* 52, 751.

**Siddappa S, Marathe GK.** 2020a. Plant Physiology and Biochemistry What we know about plant arginases ? *Plant Physiology and Biochemistry* 156, 600–610.

**Siddappa S, Marathe GK.** 2020b. What we know about plant arginases? *Plant Physiology and Biochemistry* 156, 600–610.

**Sung J, Lee S, Lee Y, et al.** 2015. Plant Science Metabolomic profiling from leaves and roots of tomato (*Solanum lycopersicum* L.) plants grown under nitrogen , phosphorus or potassium-deficient condition. *Plant Science* 241, 55–64.

**Tesfaye M, Denton MD, Samac DA, Vance CP.** 2005. Transgenic alfalfa secretes a fungal endochitinase protein to the rhizosphere. *Plant and Soil* 269, 233–243.

**Trouvelot A, Kough JL, Gianinazzi-Pearson V.** 1986. Mesure du taux de mycorhization VA d'un système racinaire. Recherche de méthode d'estimation ayant une signification

fonctionnelle. In: Gianinazzi S, Gianinazzi-Pearson V, eds. *The Mycorrhizae, Physiology and Genetics*. Paris: INRA Presse, 217–221.

**Turner T., James EK, Poole P.** 2013. The Plant Microbiome. *Genome Biology* 14, 209.

**Varshney RK, Shi C, Thudi M, et al.** 2017. Pearl millet genome sequence provides a resource to improve agronomic traits in arid environments. *Nature Biotechnology* 35, 969–976.

**Wissuwa M, Mazzola M, Picard C.** 2009. Novel approaches in plant breeding for rhizosphere-related traits. *Plant and Soil* 321, 409–430.

**Yang J, Kloepper JW, Ryu CM.** 2009. Rhizosphere bacteria help plants tolerate abiotic stress. *Trends in Plant Science* 14, 1–4.

**York LM, Carminati A, Mooney SJ, et al.** 2016. The holistic rhizosphere: integrating zones, processes, and semantics in the soil influenced by roots. *Journal of Experimental Botany* 67, 3629–3643.

**Zhang H, Wang X, Pan Q, et al.** 2019. QTG-Seq Accelerates QTL Fine Mapping through QTL Partitioning and Whole-Genome Sequencing of Bulk Segregant Samples. *Molecular Plant* 12, 426–437.

**Zhang Y, Xu F, Ding Y, et al.** 2021. Abscisic acid mediates barley rhizosheath formation under mild soil drying by promoting root hair growth and auxin response. *Plant, Cell & Environment* 44, 1935–1945.

## Tables

**Table 1. Correlation matrix of root soil aggregation and root parameters.**

| Trait           | Root architecture |       |        |               |       |        |       |        | Root hairs   |       | AM symbiosis |        |
|-----------------|-------------------|-------|--------|---------------|-------|--------|-------|--------|--------------|-------|--------------|--------|
|                 | RAS/R<br>T        | L     | RSA    | AvgDiam       | LFR   | LTR    | SAFR  | SATR   | AvgLRH       | AgDRH | F%           | I%     |
| RAS/RT          | <b>1</b>          | 0,017 | -0,081 | <b>-0,239</b> | 0,053 | -0,112 | 0,037 | -0,110 | <b>0,278</b> | 0,069 | 0,283        | -0,133 |
| <i>p</i> -value | <b>0</b>          | 0,863 | 0,397  | <b>0,012</b>  | 0,579 | 0,242  | 0,697 | 0,250  | <b>0,005</b> | 0,488 | 0,463        | 0,744  |

Value from 2 independent experiments on contrasted pearl millet lines using Spearman's correlation test. Ratio (RAS/RT) between the mass of root-adhering soil (RAS) and root tissue biomass (RT), Total root length (L), Root Surface Area (RSA), Average Root Diameter (AvgDiam), Total Length of Fine Roots (LFR), Total Length of Thick Roots (LTR), Surface Area of Fine Roots (SAFR), Surface Area of Thick Roots (SATR), Average Length of Root Hairs (AvgLRH), Average Density of Root Hairs (AgDRH), Frequency of mycorrhization (F%), Intensity of mycorrhization (I%).

**Table 2. Significant genomic regions identified by Bulk Segregant Analysis (BSA) for root-adhering soil aggregation (i.e. RAS/RT) at the 95% confidence interval.**

|               | Chr. | Peak position (Mbp) <sup>1</sup> | Region range (Mbp) <sup>2</sup> | Region length (Mbp) | Number sig SNPs |
|---------------|------|----------------------------------|---------------------------------|---------------------|-----------------|
| <i>RAS5.1</i> | 5    | 3.33                             | 0 – 11.36                       | 11.33               | 3               |
| <i>RAS5.2</i> | 5    | 112.88                           | 92.95 – 137.95                  | 45.01               | 307             |
| <i>RAS5.3</i> | 5    | 156.25                           | 148.12 – 158.68                 | 10.56               | 41              |
| <i>RAS6.1</i> | 6    | 110.41                           | 102.08 – 118.41                 | 16.33               | 16              |
| <i>RAS6.2</i> | 6    | 226.25                           | 218.25 – 240.48                 | 22.23               | 13              |

<sup>1</sup> Position of the most significant SNP in the region range

<sup>2</sup> Limits of the significant region considering the overlapping confidence interval of significant markers in the region

## Figure legends

**Figure 1. Relation between root soil aggregation, root architecture, root hair development and arbuscular mycorrhizal symbioses.** **A)** Pearson correlation between traits using adjusted lsmeans across two experiments conducted in different years. **B)** Linear regression between root diameter and root soil aggregation. Points represent the mean value of the traits for inbred lines across the two experiments. **C)** Linear regression between root hair length and root soil aggregation. Points represent the mean value of the traits for inbred lines across the two experiments.

**Figure 2. Genome-wide association studies (GWAS) for rhizosheath size in pearl millet.** Manhattan plots and QQ plots obtained with three GWAS methods. **A)** Latent Factor Mixed Model or LFMM, **B)** Mixed linear model or MLM and **C)** Efficient Mixed Model Association or EMMA. Each Manhattan plot shows the  $-\log_{10}$  p-value of the statistic (y axes) for each SNP position (x axes). The dashed line delimits the threshold for highly significant SNPs (p-value  $< 10^{-4}$ ).

**Figure 3. Genetic dissection of root soil aggregation in pearl millet by Bulk Segregant Analysis (BSA).** **A)** Cross established for Bulk Segregant Analysis (BSA) between two pearl millet inbred lines with contrasted rhizosheath phenotype. **B)** Boxplot showing the distribution of RAS/RT ratio in line ICML-11139 (N=29), ICML-IS 11084 (N=27) and F2 population (N=547). **C)** Comparison between GWAS and BSA results. Top figure represents the Manhattan plot of the GWAS by LFMM ridge method (Caye *et al.*, 2019). The x-axis corresponds to the position of the 381,899 SNPs identified by GBS in a group of 139 inbred lines. The vertical axes correspond to the  $-\log_{10}$  p value of the statistic. The dashed line delimits the threshold for highly significant SNPs (p value  $< 10^{-4}$ ). Bottom figure shows the significant regions associated with root soil aggregation identified by BSA using bulks of contrasted F2 lines from a bi-parental cross. The plot shows the Euclidean Distance statistic profile (y axis) across the seven pearl millet chromosomes (x axis). The dashed line indicates the 95% confidence interval threshold for the localisation of significant regions. In both plots, the shaded area delimits the extent of the five significant regions identified by BSA and the overlap with significant SNPs identified by GWAS and the correspondence with the BSA peaks found.

## Figure 1

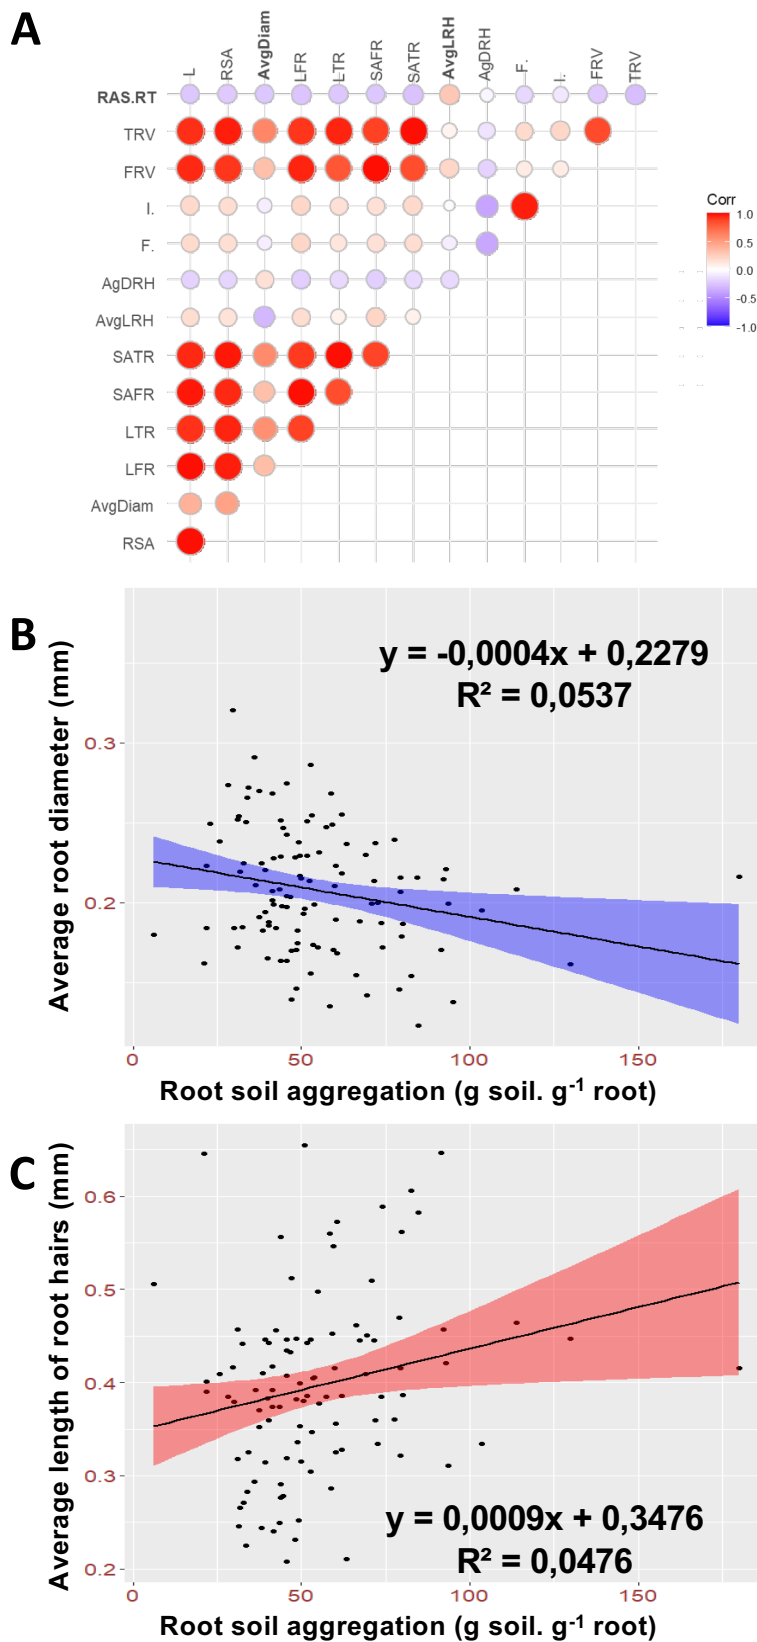

## Figure 2

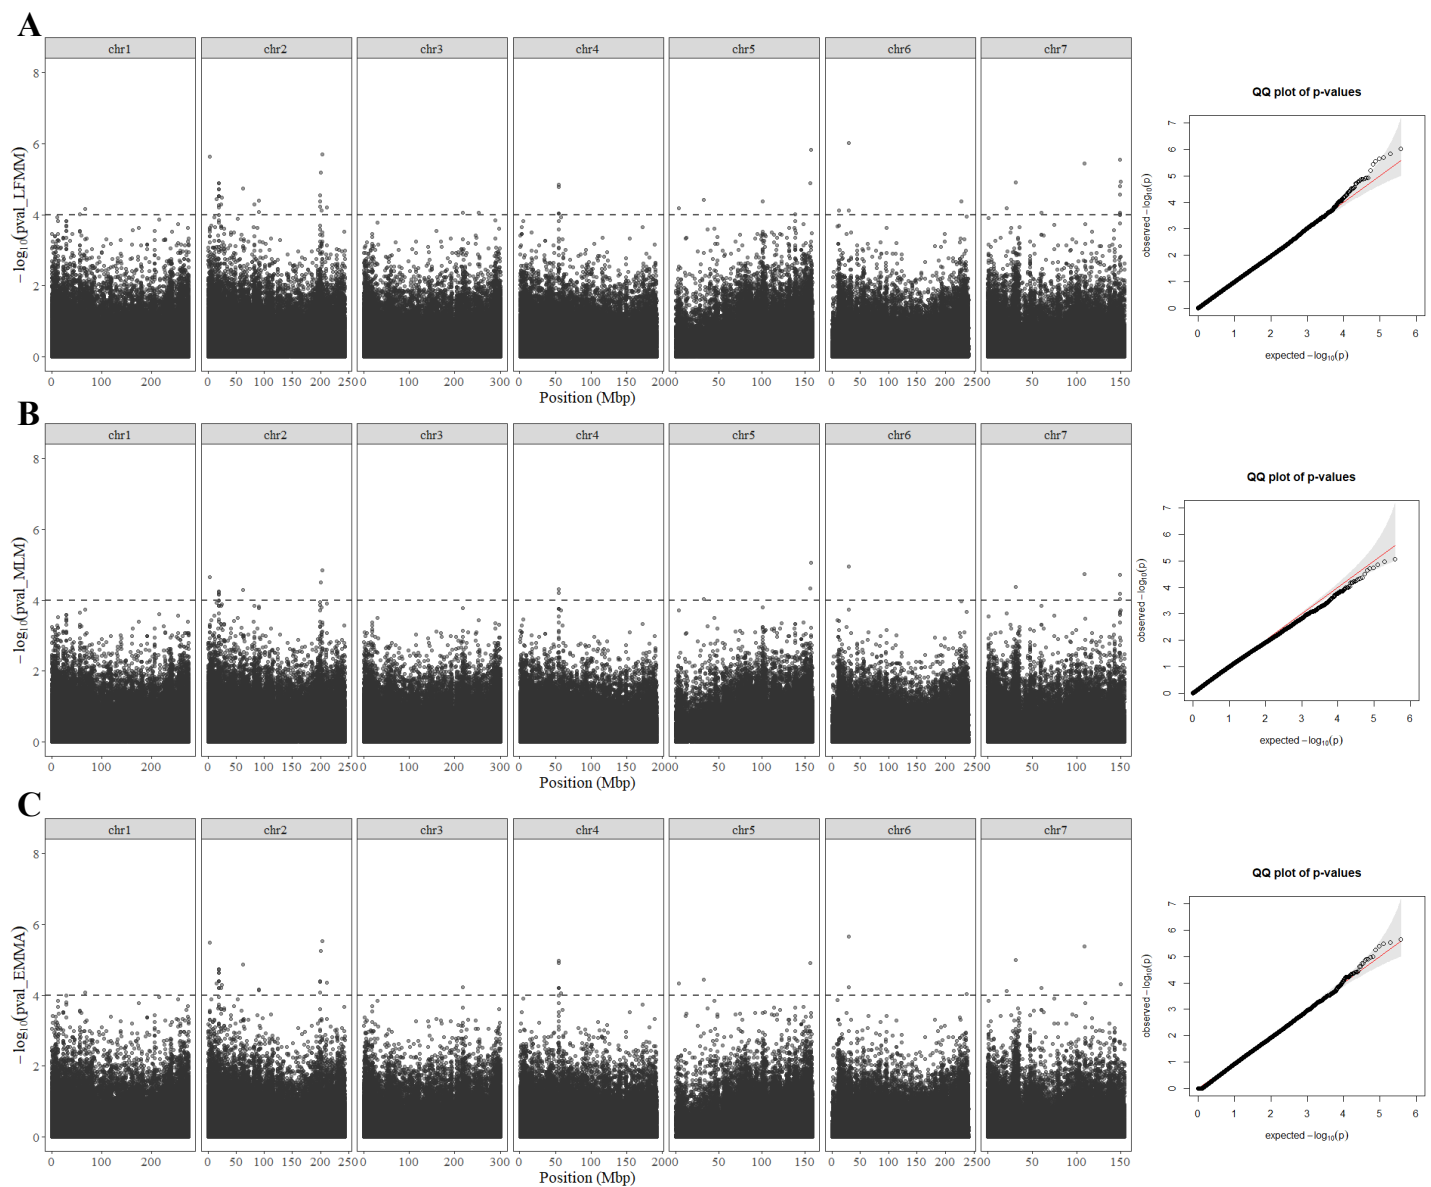

**Figure 2. Genome-wide association studies (GWAS) for rhizosheath size in pearl millet.** Manhattan plots and QQ plots obtained with three GWAS methods. A) Latent Factor Mixed Model or LFMM, B) Mixed linear model or MLM and C) Efficient Mixed Model Association or EMMA. Each Manhattan plot shows the  $-\log_{10} p$ -value of the statistic (y axis) for each SNP position (x axis). The dashed line delimits the threshold for highly significant SNPs ( $p$ -value  $< 10^{-4}$ ).

## Figure 3

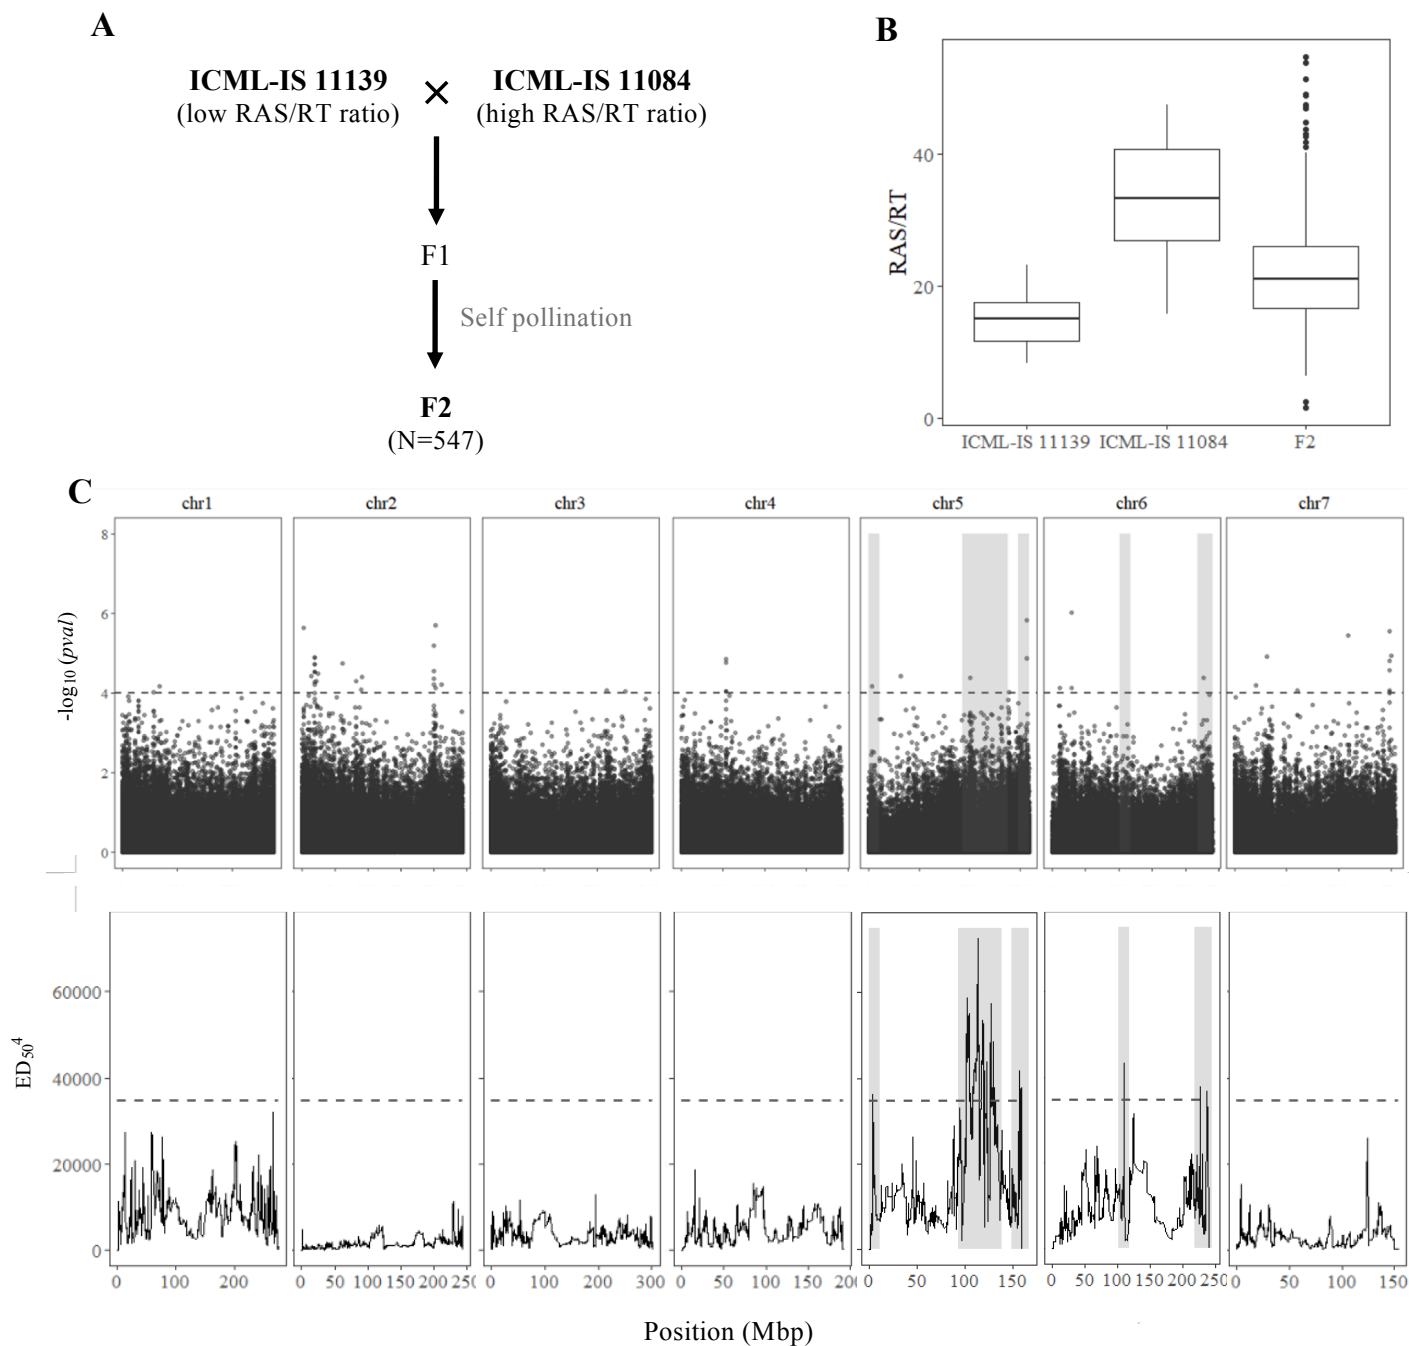

**Figure 3. Genetic dissection of root soil aggregation in pearl millet by Bulk Segregant Analysis (BSA).** **A**) Cross established for Bulk Segregant Analysis (BSA) between two pearl millet inbred lines with contrasted rhizosphere phenotype. **B**) Boxplot showing the distribution of RAS/RT ratio in line ICML-11139 (N=29), ICML-IS 11084 (N=27) and F2 population (N=547). **C**) Comparison between GWAS and BSA results. Top figure represents the Manhattan plot of the GWAS by LFMM ridge method (Caye *et al.*, 2019). The horizontal axes corresponds to the position of the 381,899 SNPs identified by GBS in a group of 139 inbred lines. The vertical axes correspond to the  $-\log_{10} pvalue$  of the statistic. The dashed line delimits the threshold for highly significant SNPs ( $p value < 10^{-4}$ ). Bottom figure shows the significant regions associated with root soil aggregation identified by BSA using bulks of contrasted F2 lines from a bi-parental cross. The plot shows the Euclidean Distance statistic profile (y axes) across the seven pearl millet chromosomes (x axes). The dashed line indicates the 95% confidence interval threshold for the localisation of significant regions. In both plots, the shaded area delimits the extent of the five significant regions identified by BSA and the overlap with significant SNPs identified by GWAS and the correspondence with the BSA peaks found.
